# Supplementary material for: Comparative de novo transcriptome profiles in Asparagus officinalis and A. kiusianus during the early stage of Phomopsis asparagi infection
Source: PubMed Central journal article supplement (PMC5453997; doi:10.1038/s41598-017-02566-7), 2017-06-01
Supplement: 41598_2017_2566_MOESM1_ESM.pdf [file 41598_2017_2566_MOESM1_ESM.pdf]

**Comparative *de novo* transcriptome profiles in *Asparagus officinalis* and *A. kiusianus* during the early stage of *Phomopsis asparagi* infection.**

Mostafa Abdelrahman<sup>1,2,\*</sup>, Naoyuki Suzumura<sup>1</sup>, Mai Mitoma<sup>1</sup>, Satoshi Matsuo<sup>3</sup>, Takao Ikeuchi<sup>4</sup>, Mitsutaka Mori<sup>4</sup>, Kyoko Murakami<sup>4</sup>, Yukio Ozaki<sup>5</sup>, Masaru Matsumoto<sup>6</sup>, Atsuko Uragami<sup>7</sup>, & Akira Kanno<sup>1,\*</sup>

<sup>1</sup>Graduate School of Life Sciences, Tohoku University, Katahira 2-1-1, Aoba-ku, Sendai 980-8577, Japan.

<sup>2</sup>Botany Department, Faculty of Science, Aswan University, Aswan 81528, Egypt.

<sup>3</sup>Institute of Vegetable and Floriculture Science, National Agriculture and Food Research Organization (NARO), 360 Kusawa, Ano, Tsu, Mie 514-2392, Japan.

<sup>4</sup>Kagawa Prefectural Agricultural Experiment Station, 1534-1 Ayagawa, Ayauta, Kagawa 761-2306, Japan.

<sup>5</sup>Faculty of Agriculture, Kyushu University, Fukuoka 811-2307, Japan.

<sup>6</sup>Institute of Tropical Agriculture, Kyushu University, Fukuoka 812-8581, Japan.

<sup>7</sup>National Agriculture and Food Research Organization, Tsukuba, 305-8519, Japan.

Correspondence and requests for materials should be addressed to Mostafa Abdelrahman (email: meettoo2000@ige.tohoku.ac.jp) or Akira Kanno (email: kanno@ige.tohoku.ac.jp)

**Supplementary Table S1:** Summary of data quality of *Asparagus* transcriptome sequences. The data describe the total raw read sequences, trimmed reads, and assembled transcripts with total numbers of detected open reading frames (ORFs).

| Accession | Library                        | Raw reads   | Clean reads | Q30 (%) | Contigs | ORF    |
|-----------|--------------------------------|-------------|-------------|---------|---------|--------|
| AO0060    | <i>A. officinalis</i> control  | 106,020,403 | 94,440,525  | 96.6    | 206,164 | 60.299 |
| AO0060    | <i>A. officinalis</i> infected | 113,444,927 | 101,235,105 | 96.7    | 206,164 | 60.299 |
| AK0501    | <i>A. kiusianus</i> control    | 100,269,889 | 90,926,718  | 96.9    | 213,950 | 63.284 |
| AK0501    | <i>A. kiusianus</i> infected   | 104,006,596 | 94,362,439  | 97.1    | 213,950 | 63.284 |

**Supplementary Table S2:** List of gene annotations and primer pairs used for real-time reverse transcription PCR (RT-PCR) and quantitative real-time reverse transcription PCR (qRT-PCR) experiments. The *elongation factor 1-alpha (eEF1A)* gene was used as the reference gene for internal control for normalization.

| Gene annotation                            | Primer pairs                                                        |
|--------------------------------------------|---------------------------------------------------------------------|
| <i>12-oxophytodienoate reductase11</i>     | F: 5' CCATGTAGAGACCGAGAGC-3'<br>R: 5' GCTGACAGAGTTGGGATAAG-3'       |
| <i>chitinase-6</i>                         | F: 5' GCACTCCTGGCTGTTGATC-3'<br>R: 5' CTAGTCTCGTTCAAGGCGG-3'        |
| <i>40S ribosomal protein S11</i>           | F: 5' TGATTTCTTCGAGCAAAGGAACACC-3'<br>R: 5' CCGCTCTCCAATCTCTCGCA-3' |
| <i>blue copper protein</i>                 | F: 5' TCGATCTCGACCTTCATCC-3'<br>R: 5' CGACAAGCAATCCGATAGC-3'        |
| <i>CYP71A1</i>                             | F: 5' CTCGTAGGCAATCTCTGCTG-3'<br>R: 5' GCAACCTCCACCAACTAGG-3'       |
| <i>aspartic proteinase nepenthesin</i>     | F: 5' GGGAGAGATTGACAAAGGG-3'<br>R: 5' GGCAGCAACCTAATCTGG-3'         |
| <i>pathogenesis-related protein 1-like</i> | F: 5' GCAGGTGACAAATACTCCG<br>R: 5' AGGGTCATGAATGTAGGCAC             |
| <i>peroxidase4</i>                         | F: 5' TCTCTCCGGTGAAGCTAGAG<br>R: 5' GACGATCAAATCAGTGGTCC            |
| <i>WRKY41</i>                              | F: 5' GTGCTAGTGAACGAATTGGG<br>R: 5' CAAGACAAGCGAGTATGTCG            |
| <i>phospholipase D alpha 1</i>             | F: 5' GTGACTTCCGAGCAGTTCTG<br>R: 5' CCATTCGAAAGATGCGAG              |
| <i>jasmonate induced protein-23 KD</i>     | F: 5' CTGAAAGCAATGAGCCAGTAC<br>R: 5' CCTTGACGTATTTGAGTGGAG          |
| <i>s-methyltransferase 1</i>               | F: 5' CGTTGTCTGATCTCCAATCC<br>R: 5' GCTTTCGTTGACACTCAGC             |
| <i>metallothionin 2</i>                    | F: 5' CAACATGTACGCTGATTTTCG<br>R: 5' CTTGCATCCATTTTCAGCTC           |
| <i>cationic peroxidase SPC4-like</i>       | F: 5' TCCATCAAACCTCGACACCAC<br>R: 5' GAAGGACTTGTTGAGGGTGG           |
| <i>phloem protein 2-like A1</i>            | F: 5' CATGCCCAAGAACGAGTG<br>R: 5' CACACAACAGCAGAACATCAC             |
| <i>elongation factor 1-alpha</i>           | F: 5' CTGGCCAGGGTGGTTCATGAT-3'<br>R: 5' TAAGTCTGTTGAGATGCACC-3'     |

**Supplementary Table S3:** Enriched KEGG pathways of differentially up-regulated genes in *A. kiusianus* in response to *Phomopsis asapargi* infection.

| <b>Pathway</b>                              | <b>% of up-regulated genes</b> | <b>Pathway ID</b> |
|---------------------------------------------|--------------------------------|-------------------|
| Metabolic pathways                          | 18.18                          | map01100          |
| Biosynthesis of secondary metabolites       | 11.11                          | map01060          |
| Plant-pathogen interaction                  | 6.06                           | map04626          |
| MAPK signaling pathway                      | 5.05                           | map04010          |
| Plant hormone signal transduction           | 5.05                           | map04057          |
| Carbon metabolism                           | 4.04                           | map01200          |
| Biosynthesis of amino acids                 | 4.04                           | map01230          |
| Starch and sucrose metabolism               | 4.04                           | map00500          |
| Purine metabolism                           | 3.03                           | map00230          |
| Glutathione metabolism                      | 3.03                           | map00480          |
| Fructose and mannose metabolism             | 3.03                           | map00051          |
| Amino sugar and nucleotide sugar metabolism | 3.03                           | map00520          |
| Alpha-Linolenic acid metabolism             | 2.02                           | map00592          |
| Zeatin biosynthesis                         | 2.02                           | map00908          |
| Selenocompound metabolism                   | 2.02                           | map00450          |
| Ribosome                                    | 2.02                           | map03010          |
| Phenylpropanoid biosynthesis                | 2.02                           | map00940          |
| Peroxisome                                  | 2.02                           | map04146          |
| Pentose phosphate pathway                   | 2.02                           | map00030          |
| Glycolysis / Gluconeogenesis                | 2.02                           | map00010          |
| Glycerophospholipid metabolism              | 2.02                           | map00564          |
| Inositol phosphate metabolism               | 1.01                           | map00562          |
| Flavonoid biosynthesis                      | 1.01                           | map00941          |
| Terpenoid backbone biosynthesis             | 1.01                           | map00900          |
| Sulfur metabolism                           | 1.01                           | map00920          |
| Steroid biosynthesis                        | 1.01                           | map00140          |
| Protein processing in endoplasmic reticulum | 1.01                           | map04141          |
| Nitrogen metabolism                         | 1.01                           | map00910          |
| Glycerolipid metabolism                     | 1.01                           | map00561          |
| Arginine and proline metabolism             | 1.01                           | map00330          |
| Vitamin B6 metabolism                       | 1.01                           | map00750          |
| Cysteine and methionine metabolism          | 1.01                           | map00270          |

**Supplemental Table S4: Parameters for measurements of jasmonic acid (JA), methyl jasmonate (MeJA), salicylic acid (SA) and abscisic acid (ABA) by liquid chromatography-tandem mass spectrometry (LC-MS/MS) analysis.** DP, declustering potential; EP, entrance potential; CEP, collision cell entrance potential; CE, collision energy; CXP, collision cell exit potential.

| Compound                            | Polarity | MS/MS transition<br>( <i>m/z</i> ) | DP (V) | EP (V) | CEP (V) | CE (V) | CXP (V) |
|-------------------------------------|----------|------------------------------------|--------|--------|---------|--------|---------|
| JA                                  | -        | 209.0/59.0                         | -20    | -8.5   | -16     | -20    | 0       |
| [ <sup>2</sup> H <sub>2</sub> ]JA   | -        | 211.0/58.9                         | -25    | -4     | -16     | -22    | 0       |
| MeJA                                | +        | 225.2/133.2                        | 26     | 11     | 16      | 19     | 4       |
| [ <sup>2</sup> H <sub>2</sub> ]MeJA | +        | 227.2/153.2                        | 26     | 9      | 16      | 17     | 4       |
| SA                                  | -        | 137.1/93.1                         | -30    | -4     | -8      | -24    | 0       |
| [ <sup>2</sup> H <sub>4</sub> ]SA   | -        | 140.9/96.9                         | -20    | -9     | -10     | -44    | 0       |
| ABA                                 | -        | 263.1/153.0                        | -25    | -4.5   | -20     | -14    | -2      |
| [ <sup>2</sup> H <sub>6</sub> ]ABA  | -        | 269.1/159.1                        | -30    | -3.5   | -20     | -20    | -2      |

**Supplementary Figure S1: Gel electrophoresis of reverse transcriptase real-time PCR (RT-PCR) in *Asparagus* species under control and inoculated conditions.** RT-PCR of selected candidate gene expression levels in *A. kiusianus* and *A. officinalis* treated with sterile distilled water (AKC and AOC, respectively) and inoculated with *Phomopsis asparagi* (AKI and AOI, respectively). Elongation factor 1-alpha served as an internal control.

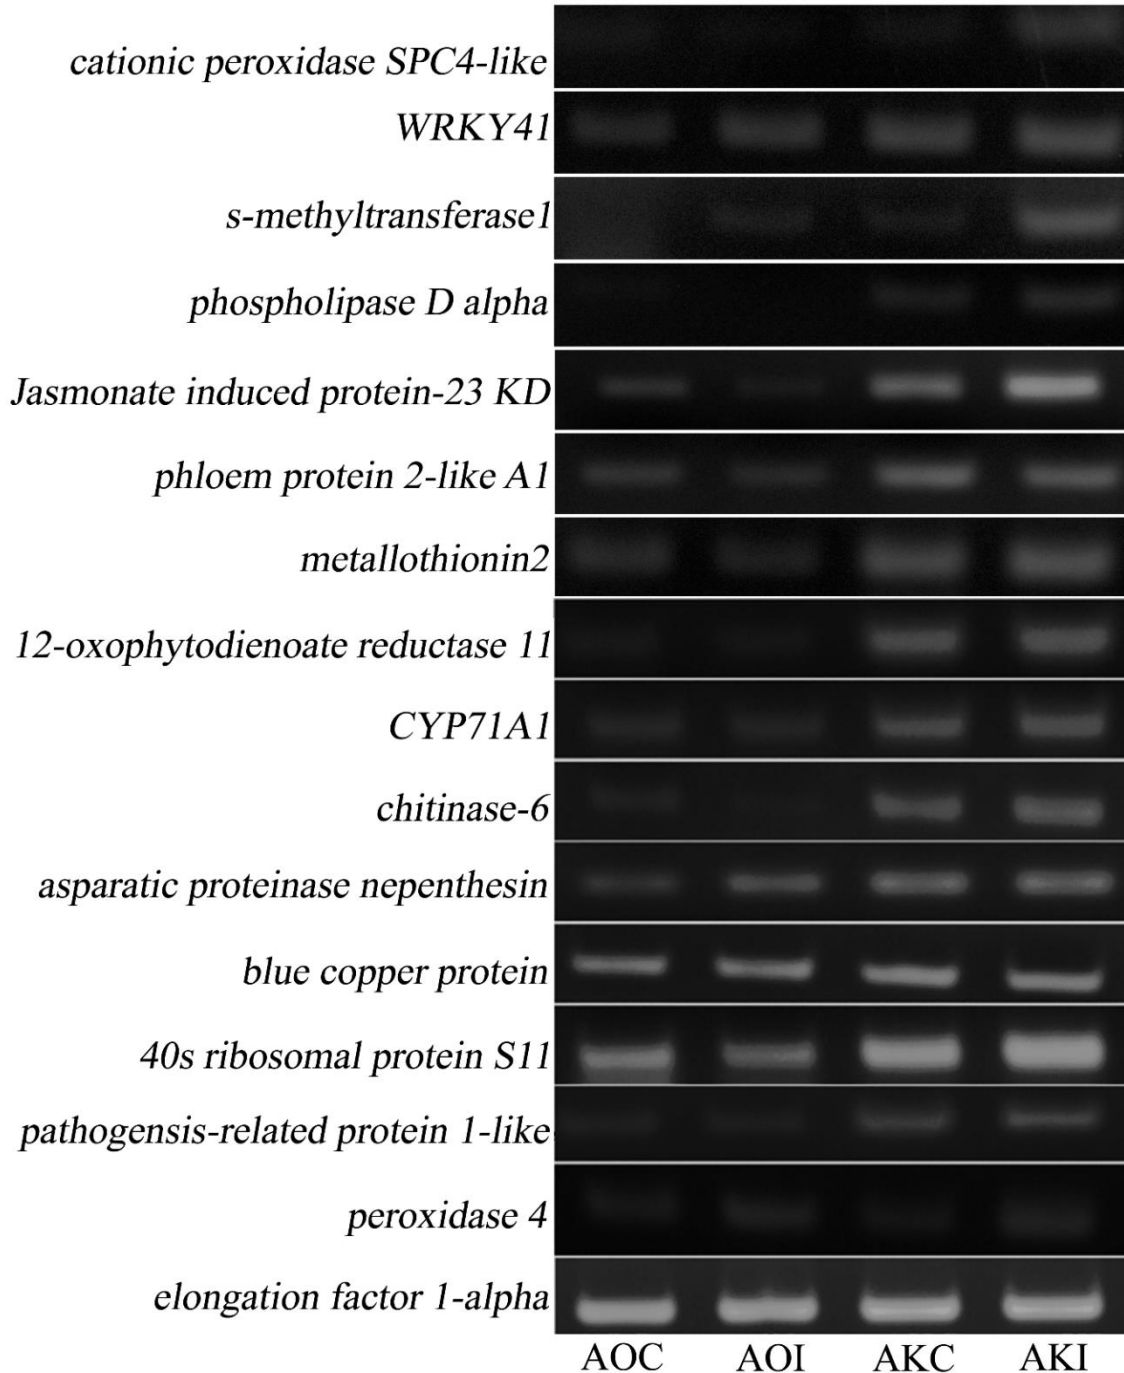

**Supplementary Fig. S2: *Asparagus officinalis* and *A. kiusianus* plants growing in the greenhouse under controlled environment conditions. Plants were inoculated with spores of *Phomopsis asparagi* using vinyl cotton method**

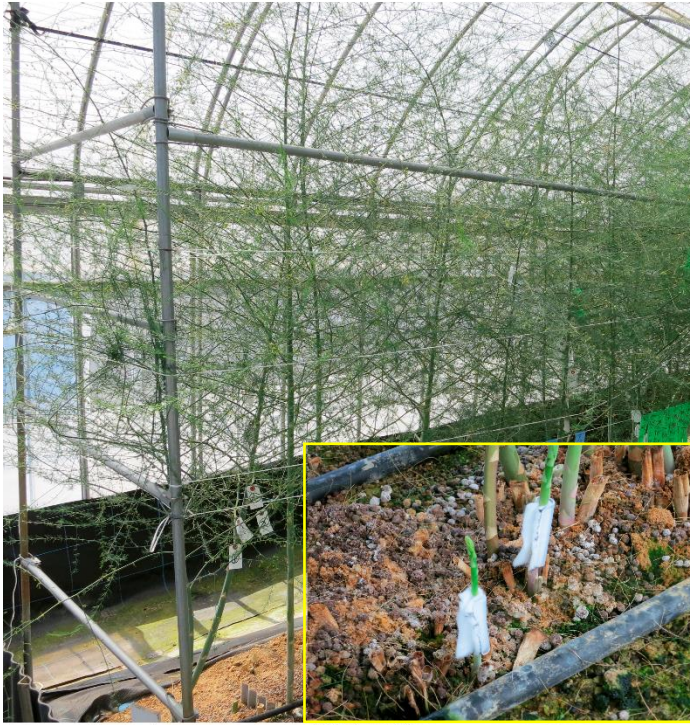

*Asparagus officinalis*

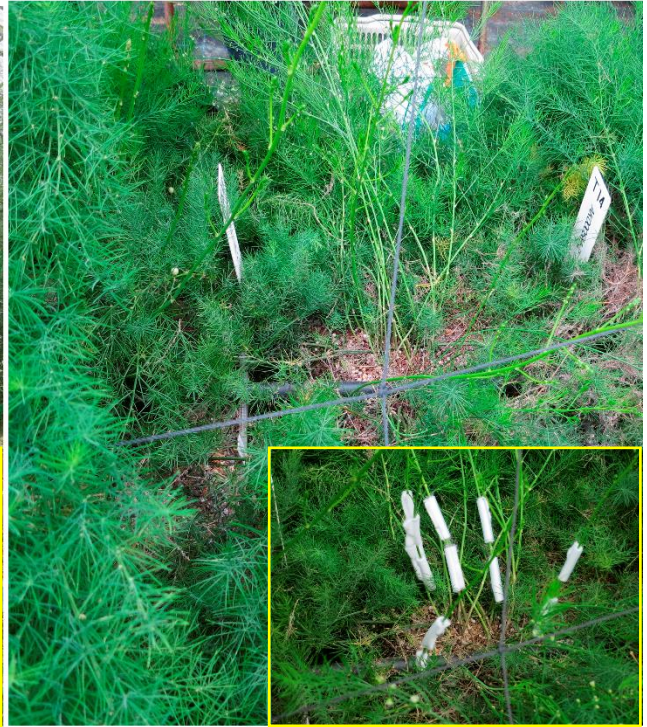

*Asparagus kiusianus*
